# Supplementary material for: Health effect of agricultural pesticide use in China: implications for the development of GM crops
Source: PubMed Central journal article supplement (PMC5056523; doi:10.1038/srep34918), 2016-10-10
Supplement: srep34918-s1.pdf [file srep34918-s1.pdf]

## Supplemental Tables

### Health effect of agricultural pesticide use in China: implications for the development of GM crops

#### Authors:

Chao Zhang, Ruifa Hu, Jikun Huang, Xusheng Huang, Guanming Shi, Yifan Li, Yanhong Yin, and Zhaohui  
Chen

#### Table of Contents

**Table S1.** Definition and description of the indicators of the blood chemistry panel

**Table S2.** Definition and description of the indicators of peripheral nerve conduction

**Table S3.** Classification of pesticides used by farmers

**Table S4.** Effects of pesticide use on the blood chemistry panel (1) (n=214)

**Table S5.** Effects of pesticide use on the blood chemistry panel (2) (n=214)

**Table S6.** Effects of pesticide use on motor nerve conduction (1) (n=218)

**Table S7.** Effects of pesticide use on motor nerve conduction (2) (n=218)

**Table S8.** Effects of pesticide use on sensory nerve conduction (n=218)

**Table S1**

Definition and description of the indicators of the blood chemistry panel

| Health indicator        | Definition                 | Unit                | First round of health check |        |        |        | Second round of health check |        |        |        |
|-------------------------|----------------------------|---------------------|-----------------------------|--------|--------|--------|------------------------------|--------|--------|--------|
|                         |                            |                     | Mean                        | SD     | Min    | Max    | Mean                         | SD     | Min    | Max    |
| <b>Hepatic function</b> |                            |                     |                             |        |        |        |                              |        |        |        |
| ALT                     | Alanine aminotransferase   | U/L                 | 24.54                       | 13.45  | 4.00   | 106.00 | 20.18                        | 11.79  | 4.00   | 122.00 |
| AST                     | Aspartate aminotransferase | U/L                 | 26.36                       | 8.91   | 13.00  | 72.00  | 23.01                        | 12.08  | 12.00  | 172.00 |
| CHE                     | Cholinesterase             | 10 <sup>3</sup> U/L | 8.09                        | 1.66   | 3.24   | 12.31  | 8.71                         | 1.73   | 4.65   | 13.53  |
| TP                      | Total protein              | g/L                 | 69.36                       | 3.90   | 62.00  | 79.00  | 76.81                        | 4.84   | 63.70  | 92.80  |
| <b>Renal function</b>   |                            |                     |                             |        |        |        |                              |        |        |        |
| BUN                     | Blood urea nitrogen        | mmol/L              | 5.52                        | 1.42   | 3.00   | 11.26  | 5.15                         | 1.31   | 1.90   | 11.40  |
| Cr                      | Creatinine                 | μmol/L              | 75.52                       | 18.07  | 44.00  | 122.00 | 72.99                        | 14.05  | 44.00  | 124.00 |
| <b>Electrolytes</b>     |                            |                     |                             |        |        |        |                              |        |        |        |
| Na                      | Sodium                     | mmol/L              | 140.71                      | 2.37   | 136.16 | 144.86 | 141.97                       | 2.49   | 134.00 | 151.00 |
| K                       | Potassium                  | mmol/L              | 4.45                        | 0.46   | 3.60   | 5.20   | 4.68                         | 0.67   | 3.68   | 9.20   |
| P                       | Inorganic phosphorus       | mmol/L              | 1.31                        | 0.28   | 0.88   | 2.20   | 1.18                         | 0.15   | 0.77   | 1.62   |
| <b>B vitamins</b>       |                            |                     |                             |        |        |        |                              |        |        |        |
| VB <sub>12</sub>        | Vitamin B <sub>12</sub>    | ng/L                | 480.94                      | 218.30 | 109.70 | 945.70 | 494.93                       | 248.44 | 142.00 | 1550.0 |
| VB <sub>9</sub>         | Serum folic acid           | μg/L                | 10.52                       | 4.04   | 3.25   | 19.17  | 8.29                         | 4.42   | 2.97   | 22.00  |
| GLU                     | Serum glucose              | mmol/L              | 4.86                        | 1.00   | 3.90   | 14.08  | 5.46                         | 1.02   | 4.16   | 12.48  |
| CRP                     | C-reactive protein         | mg/L                | 1.29                        | 5.01   | 0.00   | 52.00  | 1.62                         | 3.63   | 0.01   | 37.20  |

Data come from authors' survey. SD refers to the standard deviation.

**Table S2**

Definition and description of the indicators of peripheral nerve conduction

| Health indicator                                           | Peripheral nerve name | Unit | First round of health check |      |       |       | Second round of health check |      |       |       |
|------------------------------------------------------------|-----------------------|------|-----------------------------|------|-------|-------|------------------------------|------|-------|-------|
|                                                            |                       |      | Mean                        | SD   | Min   | Max   | Mean                         | SD   | Min   | Max   |
| <b><i>Motor nerve conduction</i></b>                       |                       |      |                             |      |       |       |                              |      |       |       |
| <b>Motor conduction velocity</b>                           |                       |      |                             |      |       |       |                              |      |       |       |
| MMCV                                                       | Median nerve          | m/s  | 59.76                       | 4.46 | 43.50 | 73.30 | 58.70                        | 4.25 | 41.70 | 68.60 |
| UMCV                                                       | Ulnar nerve           | m/s  | 58.00                       | 4.49 | 46.40 | 73.70 | 57.18                        | 4.11 | 46.40 | 68.40 |
| TMCV                                                       | Tibial nerve          | m/s  | 47.68                       | 3.94 | 35.90 | 60.00 | 47.68                        | 3.85 | 38.80 | 63.70 |
| PMCV                                                       | Common peroneal nerve | m/s  | 48.59                       | 4.47 | 27.00 | 60.00 | 48.49                        | 4.32 | 25.80 | 57.10 |
| <b>Proximal compound muscle action potential amplitude</b> |                       |      |                             |      |       |       |                              |      |       |       |
| MPCMAP                                                     | Median nerve          | mV   | 12.20                       | 3.23 | 5.60  | 20.90 | 13.68                        | 3.99 | 5.70  | 27.40 |
| UPCMAP                                                     | Ulnar nerve           | mV   | 11.33                       | 2.29 | 5.20  | 18.90 | 12.44                        | 2.79 | 1.00  | 21.10 |
| TPCMAP                                                     | Tibial nerve          | mV   | 11.21                       | 3.86 | 3.50  | 25.00 | 11.21                        | 3.84 | 3.10  | 21.40 |
| PPCMAP                                                     | Common peroneal nerve | mV   | 6.50                        | 3.12 | 0.10  | 20.20 | 6.79                         | 3.27 | 0.10  | 19.80 |
| <b>Distal compound muscle action potential amplitude</b>   |                       |      |                             |      |       |       |                              |      |       |       |
| MDCMAP                                                     | Median nerve          | mV   | 12.97                       | 3.40 | 5.60  | 23.00 | 14.13                        | 4.11 | 6.00  | 28.80 |
| UDCMAP                                                     | Ulnar nerve           | mV   | 12.17                       | 2.27 | 6.10  | 20.00 | 13.07                        | 2.71 | 5.40  | 23.00 |
| TDCMAP                                                     | Tibial nerve          | mV   | 14.31                       | 4.74 | 4.20  | 26.70 | 13.54                        | 4.49 | 4.30  | 27.70 |
| PDCMAP                                                     | Common peroneal nerve | mV   | 7.17                        | 3.32 | 0.10  | 19.10 | 7.37                         | 3.34 | 0.10  | 18.50 |
| <b>Distal motor latency</b>                                |                       |      |                             |      |       |       |                              |      |       |       |
| MDML                                                       | Median nerve          | ms   | 3.34                        | 0.52 | 2.10  | 7.20  | 3.45                         | 0.67 | 2.60  | 8.70  |
| UDML                                                       | Ulnar nerve           | ms   | 2.63                        | 0.28 | 2.00  | 3.60  | 2.86                         | 0.65 | 2.00  | 8.90  |
| TDML                                                       | Tibial nerve          | ms   | 3.67                        | 0.46 | 2.70  | 4.80  | 3.69                         | 0.47 | 2.70  | 5.00  |
| PDML                                                       | Common peroneal nerve | ms   | 3.73                        | 0.63 | 2.50  | 6.70  | 3.72                         | 0.81 | 2.70  | 11.80 |
| <b><i>Sensory nerve conduction</i></b>                     |                       |      |                             |      |       |       |                              |      |       |       |
| <b>Sensory conduction velocity</b>                         |                       |      |                             |      |       |       |                              |      |       |       |
| MSCV                                                       | Median nerve          | m/s  | 58.04                       | 6.11 | 33.30 | 69.60 | 58.51                        | 6.33 | 32.60 | 72.70 |
| USCV                                                       | Ulnar nerve           | m/s  | 54.33                       | 4.53 | 37.00 | 65.70 | 54.17                        | 5.40 | 20.00 | 68.00 |
| SSCV                                                       | Sural nerve           | m/s  | 59.58                       | 4.98 | 50.00 | 75.00 | 60.44                        | 5.64 | 50.00 | 71.40 |
| <b>Sensory nerve action potential amplitude</b>            |                       |      |                             |      |       |       |                              |      |       |       |
| MSNAP                                                      | Median nerve          | mV   | 7.67                        | 3.17 | 1.20  | 21.00 | 8.41                         | 3.35 | 2.00  | 21.00 |
| USNAP                                                      | Ulnar nerve           | mV   | 5.84                        | 2.49 | 1.00  | 17.00 | 6.29                         | 2.65 | 0.70  | 18.00 |
| SSNAP                                                      | Sural nerve           | mV   | 15.24                       | 6.91 | 4.20  | 44.00 | 16.22                        | 7.60 | 4.70  | 69.00 |

Data come from authors' survey. SD refers to the standard deviation.

**Table S3**

Classification of pesticides used by farmers

| Chinese                                   | Pesticide name                     | No. of spraying farmers | Average amount (kilogram) |                 |
|-------------------------------------------|------------------------------------|-------------------------|---------------------------|-----------------|
|                                           | English                            |                         | Per spraying farmers      | Per all farmers |
| <b>Glyphosate</b>                         |                                    |                         |                           |                 |
| 草甘膦                                       | Glyphosate                         | 84                      | 1610.81                   | 604.05          |
| <b>Non-glyphosate herbicides</b>          |                                    |                         |                           |                 |
| 百草枯                                       | Paraquat                           | 84                      | 379.61                    | 142.36          |
| 乙草胺                                       | Acetochlor                         | 23                      | 951.45                    | 97.69           |
| 莠去津                                       | Atrazine                           | 11                      | 1376.09                   | 67.58           |
| 苯磺隆                                       | Tribenuron-methyl                  | 11                      | 64.16                     | 3.15            |
| 乙草胺 莠去津                                   | Acetochlor Atrazine                | 9                       | 468.56                    | 18.83           |
| 噻吩磺隆                                      | Thifensulfuron-methyl              | 8                       | 14.49                     | 0.52            |
| 苄嘧磺隆 丁草胺                                  | Bensulfuron-methyl Butachlor       | 7                       | 47.21                     | 1.48            |
| 高效氟吡甲禾灵                                   | Haloxyfop-P-methyl                 | 7                       | 122.89                    | 3.84            |
| 异丙草胺 莠去津                                  | Propisochlor Atrazine              | 7                       | 757.71                    | 23.68           |
| 氟乐灵                                       | Trifluralin                        | 7                       | 1400.86                   | 43.78           |
| 甲草胺 乙草胺 莠去津                               | Alachlor Acetochlor Atrazine       | 6                       | 797.00                    | 21.35           |
| 硝磺草酮 莠去津                                  | Mesotrione Atrazine                | 6                       | 314.25                    | 8.42            |
| 苄嘧磺隆                                      | Bensulfuron-methyl                 | 5                       | 61.32                     | 1.37            |
| 草铵膦                                       | Glufosinate-ammonium               | 5                       | 3800.00                   | 84.82           |
| 烟嘧磺隆                                      | Nicosulfuron                       | 5                       | 2760.00                   | 61.61           |
| 精喹禾灵                                      | Quizalofop-ethyl                   | 5                       | 10.80                     | 0.24            |
| 2,4-滴丁酯                                   | 2,4-D butylate                     | 4                       | 31.61                     | 0.56            |
| 丁草胺                                       | Butachlor                          | 4                       | 101.40                    | 1.81            |
| 丁草胺 异丙草胺 莠去津                              | Butachlor Propisochlor Atrazine    | 4                       | 434.00                    | 7.75            |
| 乙羧氟草醚                                     | Fluoroglyphofen-ethyl              | 4                       | 18.20                     | 0.33            |
| 苄嘧磺隆 丙草胺                                  | Bensulfuron-methyl Pretilachlor    | 3                       | 43.50                     | 0.58            |
| 硝磺草酮                                      | Mesotrione                         | 3                       | 9.33                      | 0.13            |
| 甲磺隆                                       | Metsulfuron-methyl                 | 3                       | 411.67                    | 5.51            |
| 苄嘧磺隆 乙草胺                                  | Bensulfuron-methyl Acetochlor      | 2                       | 14.63                     | 0.13            |
| 二甲戊灵 乙草胺                                  | Pendimethalin Acetochlor           | 2                       | 80.00                     | 0.71            |
| 扑草净 乙草胺                                   | Prometryn Acetochlor               | 2                       | 401.00                    | 3.58            |
| 乙草胺 莠去津 2,4-滴丁酯                           | Acetochlor Atrazine 2,4-D butylate | 1                       | 276.48                    | 1.23            |
| 甲草胺                                       | Alachlor                           | 1                       | 28.80                     | 0.13            |
| 仲丁灵                                       | Butralin                           | 1                       | 144.00                    | 0.64            |
| 氰氟草酯                                      | Cyhalofop-butyl                    | 1                       | 20.00                     | 0.09            |
| 异丙甲草胺                                     | Metolachlor                        | 1                       | 288.00                    | 1.29            |
| 烟嘧磺隆 莠去津                                  | Nicosulfuron Atrazine              | 1                       | 60.00                     | 0.27            |
| 五氟磺草胺                                     | Penoxsulam                         | 1                       | 5.00                      | 0.02            |
| 丙草胺                                       | Pretilachlor                       | 1                       | 90.00                     | 0.40            |
| 异丙草胺                                      | Propisochlor                       | 1                       | 130.00                    | 0.58            |
| 异丙草胺 乙草胺 莠去津                              | Propisochlor Acetochlor Atrazine   | 1                       | 520.00                    | 2.32            |
| <b>Chemical lepidopteran insecticides</b> |                                    |                         |                           |                 |
| 阿维菌素                                      | Abamectin                          | 119                     | 104.35                    | 55.43           |
| 甲维盐                                       | Emamectin benzoate                 | 68                      | 54.81                     | 16.64           |
| 氧乐果                                       | Omethoate                          | 40                      | 2257.04                   | 403.04          |

|             |                                      |    |         |        |
|-------------|--------------------------------------|----|---------|--------|
| 高效氯氰菊酯      | Beta-cypermethrin                    | 38 | 89.64   | 15.21  |
| 高效氯氟氰菊酯     | Lambda-cyhalothrin                   | 38 | 67.30   | 11.42  |
| 毒死蜱         | Chlorpyrifos                         | 35 | 1281.24 | 200.19 |
| 氯氰菊酯        | Cypermethrin                         | 31 | 133.35  | 18.46  |
| 杀虫双         | Bisultap                             | 28 | 362.39  | 45.30  |
| 甲维盐 丙溴磷     | Emamectin benzoate Profenofos        | 21 | 130.70  | 12.25  |
| 敌敌畏         | Dlchlorvos                           | 20 | 2739.23 | 244.57 |
| 辛硫磷         | Phoxim                               | 20 | 4076.09 | 363.94 |
| 乐果          | Dimethoate                           | 17 | 370.71  | 28.13  |
| 乙酰甲胺磷       | Acephate                             | 14 | 791.14  | 49.45  |
| 高效氯氰菊酯 辛硫磷  | Beta-cypermethrin Phoxim             | 13 | 311.15  | 18.06  |
| 丁硫克百威       | Carbosulfan                          | 13 | 547.60  | 31.78  |
| 氯氟氰菊酯       | Cyhalothrin                          | 13 | 77.58   | 4.50   |
| 灭多威         | Methomyl                             | 13 | 2170.90 | 125.99 |
| 阿维菌素 啶虫脒    | Abamectin Acetamiprid                | 12 | 35.16   | 1.88   |
| 联苯菊酯        | Bifenthrin                           | 12 | 18.27   | 0.98   |
| 氟铃脲 毒死蜱     | Hexaflumuron Chlorpyrifos            | 12 | 94.87   | 5.08   |
| 顺式氯氰菊酯      | Alpha-cypermethrin                   | 11 | 11.02   | 0.54   |
| 阿维菌素 高效氯氰菊酯 | Abamectin Beta-cypermethrin          | 10 | 28.37   | 1.27   |
| 阿维菌素 毒死蜱    | Abamectin Chlorpyrifos               | 10 | 620.88  | 27.72  |
| 高效氯氰菊酯 马拉硫磷 | Beta-cypermethrin Malathion          | 10 | 184.40  | 8.23   |
| 除虫脲         | Diflubenzuron                        | 10 | 728.10  | 32.50  |
| 甲维盐 高效氯氰菊酯  | Emamectin benzoate Beta-cypermethrin | 10 | 90.24   | 4.03   |
| 甲维盐 毒死蜱     | Emamectin benzoate Chlorpyrifos      | 10 | 275.95  | 12.32  |
| 氰戊菊酯        | Fenvalerate                          | 10 | 200.20  | 8.94   |
| 虫酰肼         | Tebufenozide                         | 10 | 2509.70 | 112.04 |
| 氯虫苯甲酰胺      | Chlorantraniliprole                  | 9  | 2329.44 | 93.59  |
| 氰戊菊酯 马拉硫磷   | Fenvalerate Malathion                | 9  | 98.67   | 3.96   |
| 阿维菌素 甲氰菊酯   | Abamectin Fenpropathrin              | 8  | 26.34   | 0.94   |
| 溴氰菊酯        | Deltamethrin                         | 8  | 24.55   | 0.88   |
| 甲氰菊酯 氧乐果    | Fenpropathrin Omethoate              | 8  | 47.06   | 1.68   |
| 氟铃脲         | Hexaflumuron                         | 8  | 32.93   | 1.18   |
| 辛硫磷 马拉硫磷    | Phoxim Malathion                     | 8  | 95.63   | 3.42   |
| 硫丹          | Endosulfan                           | 7  | 984.24  | 30.76  |
| 阿维菌素 灭幼脲    | Abamectin Chlorbenzuron              | 5  | 314.60  | 7.02   |
| 阿维菌素 氟铃脲    | Abamectin Hexaflumuron               | 5  | 30.30   | 0.68   |
| 灭幼脲         | Chlorbenzuron                        | 5  | 102.10  | 2.28   |
| 阿维菌素 辛硫磷    | Abamectin Phoxim                     | 4  | 55.25   | 0.99   |
| 克百威         | Carbofuran                           | 4  | 235.00  | 4.20   |
| 硫丹 辛硫磷      | Endosulfan Phoxim                    | 4  | 295.31  | 5.27   |
| 氰戊菊酯 乐果     | Fenvalerate Dimethoate               | 4  | 211.50  | 3.78   |
| 氟铃脲 辛硫磷     | Hexaflumuron Phoxim                  | 4  | 140.68  | 2.51   |
| 丙溴磷         | Profenofos                           | 4  | 168.00  | 3.00   |
| 敌百虫         | Trichlorfon                          | 4  | 317.50  | 5.67   |
| 高效氯氰菊酯 灭多威  | Beta-cypermethrin Methomyl           | 3  | 94.50   | 1.27   |
| 氟啶脲         | Chlorfuazuron                        | 3  | 955.00  | 12.79  |
| 氯氰菊酯 毒死蜱    | Cypermethrin Chlorpyrifos            | 3  | 130.42  | 1.75   |
| 甲维盐 氟铃脲     | Emamectin benzoate Hexaflumuron      | 3  | 5.99    | 0.08   |

|                 |                                        |   |         |      |
|-----------------|----------------------------------------|---|---------|------|
| 氰戊菊酯 敌百虫        | Fenvalerate Trichlorfon                | 3 | 42.00   | 0.56 |
| 氟虫双酰胺           | Fuchongshuangxianan                    | 3 | 15.10   | 0.20 |
| 阿维菌素 氯氰菊酯       | Abamectin Cypermethrin                 | 2 | 42.50   | 0.38 |
| 阿维菌素 三唑磷        | Abamectin Triazophos                   | 2 | 78.00   | 0.70 |
| 乙酰甲胺磷 毒死蜱       | Acephate Chlorpyrifos                  | 2 | 56.00   | 0.50 |
| 高效氯氰菊酯 氟啶脲      | Beta-cypermethrin Chlorfuazuron        | 2 | 145.00  | 1.29 |
| 高效氯氰菊酯 毒死蜱      | Beta-cypermethrin Chlorpyrifos         | 2 | 130.00  | 1.16 |
| 溴氰虫酰胺           | Cyantraniliprole                       | 2 | 16.00   | 0.14 |
| 氯氰菊酯 辛硫磷        | Cypermethrin Phoxim                    | 2 | 16.45   | 0.15 |
| 氯氰菊酯 丙溴磷        | Cypermethrin Profenofos                | 2 | 66.00   | 0.59 |
| 溴氰菊酯 马拉硫磷       | Deltamethrin Malathion                 | 2 | 143.75  | 1.28 |
| 二嗪磷             | Diazinon                               | 2 | 750.00  | 6.70 |
| 甲维盐 氯氰菊酯        | Emamectin benzoate Cypermethrin        | 2 | 11.20   | 0.10 |
| 硫丹 灭多威          | Endosulfan Methomyl                    | 2 | 125.00  | 1.12 |
| 醚菊酯             | Etofenprox                             | 2 | 77.50   | 0.69 |
| 甲氰菊酯            | Fenpropathrin                          | 2 | 106.00  | 0.95 |
| 水胺硫磷            | Isocarboxiphos                         | 2 | 85.00   | 0.76 |
| 高效氯氟氰菊酯 三唑磷     | Lambda-cyhalothrin Triazophos          | 2 | 975.00  | 8.71 |
| 辛硫磷 灭多威         | Phoxim Methomyl                        | 2 | 402.50  | 3.59 |
| 多杀霉素            | Spinosad                               | 2 | 3.38    | 0.03 |
| 三唑磷             | Triazophos                             | 2 | 46.00   | 0.41 |
| 三唑磷 辛硫磷         | Triazophos Phoxim                      | 2 | 57.00   | 0.51 |
| 阿维菌素 毒死蜱 三唑磷    | Abamectin Chlorpyrifos Triazophos      | 1 | 30.50   | 0.14 |
| 阿维菌素 氟酰胺        | Abamectin Fuchongshuangxianan          | 1 | 1.50    | 0.01 |
| 高效氟氯氰菊酯 辛硫磷     | Beta-cyfluthrin Phoxim                 | 1 | 64.50   | 0.29 |
| 高效氯氰菊酯 氟铃脲      | Beta-cypermethrin Hexaflumuron         | 1 | 6.84    | 0.03 |
| 高效氯氰菊酯 吡虫啉      | Beta-cypermethrin Imidacloprid         | 1 | 6.00    | 0.03 |
| 高效氯氰菊酯 辛硫磷 马拉硫磷 | Beta-cypermethrin Phoxim Malathion     | 1 | 1200.00 | 5.36 |
| 高效氯氰菊酯 三唑磷      | Beta-cypermethrin Triazophos           | 1 | 31.50   | 0.14 |
| 氯虫苯甲酰胺 高效氯氰菊酯   | Chlorantraniliprole Beta-cypermethrin  | 1 | 35.00   | 0.16 |
| 氯虫苯甲酰胺 高效氯氟氰菊酯  | Chlorantraniliprole Lambda-cyhalothrin | 1 | 7.00    | 0.03 |
| 氯氰菊酯 三唑磷        | Cypermethrin Triazophos                | 1 | 33.00   | 0.15 |
| 甲维盐 啶虫脒         | Emamectin benzoate Acetamiprid         | 1 | 0.96    | 0.00 |
| 甲维盐 印楝素         | Emamectin benzoate Azadirachtin        | 1 | 2.40    | 0.01 |
| 甲维盐 氯虫苯甲酰胺      | Emamectin benzoate Chlorantraniliprole | 1 | 35.20   | 0.16 |
| 甲维盐 虫酰肼         | Emamectin benzoate Tebufenozide        | 1 | 48.30   | 0.22 |
| 氰戊菊酯 氧乐果        | Fenvalerate Omethoate                  | 1 | 1125.00 | 5.02 |
| 氰戊菊酯 辛硫磷        | Fenvalerate Phoxim                     | 1 | 48.00   | 0.21 |
| 氰戊菊酯 鱼藤酮        | Fenvalerate Rotenone                   | 1 | 13.65   | 0.06 |
| 茚虫威             | Indoxacarb                             | 1 | 24.00   | 0.11 |
| 高效氯氟氰菊酯 辛硫磷     | Lambda-cyhalothrin Phoxim              | 1 | 4.80    | 0.02 |
| 氰氟虫腙            | Metaflumizone                          | 1 | 14.40   | 0.06 |
| 杀虫单             | Monosultap                             | 1 | 195.00  | 0.87 |
| 对硫磷             | Parathion                              | 1 | 5.00    | 0.02 |
| 亚胺硫磷            | Phosmet                                | 1 | 120.00  | 0.54 |
| 辛硫磷 毒死蜱         | Phoxim Chlorpyrifos                    | 1 | 100.00  | 0.45 |
| 硫磺 苦参碱          | Sulfur Matrine                         | 1 | 8.19    | 0.04 |
| 特丁硫磷            | Terbufos                               | 1 | 810.00  | 3.62 |

|                                             |                                  |    |         |        |
|---------------------------------------------|----------------------------------|----|---------|--------|
| 噻虫嗪 氯虫苯甲酰胺                                  | Thiamethoxam Chlorantraniliprole | 1  | 25.60   | 0.11   |
| <b>Biological lepidopteran insecticides</b> |                                  |    |         |        |
| 苏云金杆菌                                       | <i>Bacillus thuringiensis</i>    | 50 | 622.90  | 139.04 |
| 棉铃虫核型多角体病毒                                  | Heliothis armigera NPV           | 25 | 904.80  | 100.98 |
| 苦参碱                                         | Matrine                          | 3  | 0.65    | 0.01   |
| 斜纹夜蛾核型多角体病毒                                 | Spodopteraliture NPV             | 3  | 2740.00 | 36.70  |
| 白僵菌                                         | Beauveria                        | 2  | 627.50  | 5.60   |
| 印楝素                                         | Azadirachtin                     | 1  | 1.40    | 0.01   |
| 烟碱 苦参碱                                      | Nicotine Matrine                 | 1  | 0.96    | 0.00   |
| <b>Non-lepidopteran insecticides</b>        |                                  |    |         |        |
| 啶虫脒                                         | Acetamiprid                      | 85 | 342.13  | 129.82 |
| 吡虫啉                                         | Imidacloprid                     | 70 | 127.04  | 39.70  |
| 啶螨灵                                         | Pyridaben                        | 19 | 26.22   | 2.22   |
| 阿维菌素 啶螨灵                                    | Abamectin Pyridaben              | 18 | 31.72   | 2.55   |
| 马拉硫磷                                        | Malathion                        | 14 | 943.07  | 58.94  |
| 氟虫腈                                         | Fipronil                         | 10 | 28.21   | 1.26   |
| 阿维菌素 吡虫啉                                    | Abamectin Imidacloprid           | 9  | 5.49    | 0.22   |
| 噻嗪酮                                         | Buprofezin                       | 6  | 116.68  | 3.13   |
| 四螨嗪 啶螨灵                                     | Clofentezine Pyridaben           | 6  | 18.65   | 0.50   |
| 灭蝇胺                                         | Cyromazine                       | 6  | 10.33   | 0.28   |
| 吡虫啉 灭多威                                     | Imidacloprid Methomyl            | 5  | 11.70   | 0.26   |
| 二甲基二硫醚                                      | Dithioether                      | 4  | 2.50    | 0.04   |
| 异丙威                                         | Isoprocarb                       | 4  | 26.85   | 0.48   |
| 吡蚜酮                                         | Pymetrozine                      | 4  | 68.44   | 1.22   |
| 阿维菌素 矿物油                                    | Abamectin Petroleum oil          | 3  | 68.60   | 0.92   |
| 速灭威                                         | Metolcarb                        | 3  | 84.25   | 1.13   |
| 稻丰散 仲丁威                                     | Phenthoate Fenobucarb            | 3  | 216.00  | 2.89   |
| 甲拌磷                                         | Phorate                          | 3  | 1548.25 | 20.74  |
| 阿维菌素 炔螨特                                    | Abamectin Propargite             | 2  | 364.00  | 3.25   |
| 噻嗪酮 异丙威                                     | Buprofezin Isoprocarb            | 2  | 33.75   | 0.30   |
| 马拉硫磷 异丙威                                    | Malathion Isoprocarb             | 2  | 8.40    | 0.08   |
| 烯啶虫胺                                        | Nitenpyram                       | 2  | 55.50   | 0.50   |
| 阿维菌素 四螨嗪                                    | Abamectin Clofentezine           | 1  | 10.40   | 0.05   |
| 阿维菌素 吡蚜酮                                    | Abamectin Pymetrozine            | 1  | 108.00  | 0.48   |
| 啶虫脒 辛硫磷                                     | Acetamiprid Phoxim               | 1  | 60.00   | 0.27   |
| 高效氯氰菊酯 氧乐果                                  | Beta-cypermethrin Omethoate      | 1  | 18.00   | 0.08   |
| 联苯菊酯 啶虫脒                                    | Bifenthrin Acetamiprid           | 1  | 18.00   | 0.08   |
| 噻嗪酮 速灭威                                     | Buprofezin Metolcarb             | 1  | 30.00   | 0.13   |
| 毒杀芬                                         | Camphechlor                      | 1  | 90.00   | 0.40   |
| 四螨嗪                                         | Clofentezine                     | 1  | 1.20    | 0.01   |
| 啶螨酯                                         | Fenpyronximate                   | 1  | 2.25    | 0.01   |
| 氟邦尼                                         | Fubangni                         | 1  | 82.04   | 0.37   |
| 吡虫啉 仲丁威                                     | Imidacloprid Fenobucarb          | 1  | 240.00  | 1.07   |
| 烯啶虫胺 吡蚜酮                                    | Nitenpyram Pymetrozine           | 1  | 2.40    | 0.01   |
| 甲拌磷 克百威                                     | Phorate Carbofuron               | 1  | 125.00  | 0.56   |
| 吡蚜酮 噻嗪酮                                     | Pymetrozine Buprofezin           | 1  | 35.00   | 0.16   |
| 吡蚜酮 异丙威                                     | Pymetrozine Isoprocarb           | 1  | 12.00   | 0.05   |
| 鱼藤酮                                         | Rotenone                         | 1  | 1.08    | 0.00   |

|                   |                                         |    |         |        |
|-------------------|-----------------------------------------|----|---------|--------|
| 噻虫嗪               | Thiamethoxam                            | 1  | 7.50    | 0.03   |
| <b>Fungicides</b> |                                         |    |         |        |
| 代森锌               | Zineb                                   | 35 | 1248.23 | 195.04 |
| 代森锰锌              | Mancozeb                                | 25 | 903.06  | 100.79 |
| 多菌灵               | Carbendazim                             | 22 | 419.06  | 41.16  |
| 百菌清               | Chlorothalonil                          | 20 | 916.24  | 81.81  |
| 烯酰吗啉              | Dimethomorph                            | 17 | 164.54  | 12.49  |
| 井冈霉素              | Jingangmycin                            | 13 | 50.98   | 2.96   |
| 丙环唑               | Propiconazol                            | 13 | 35.71   | 2.07   |
| 链霉素               | Streptomycin                            | 13 | 58.03   | 3.37   |
| 霜脍氰 代森锰锌          | Cymoxanil Mancozeb                      | 12 | 607.20  | 32.53  |
| 咪鲜胺               | Prochloraz                              | 12 | 365.93  | 19.60  |
| 苯醚甲环唑             | Difenoconazole                          | 11 | 27.01   | 1.33   |
| 春雷霉素              | Kasugamycin                             | 10 | 3.92    | 0.18   |
| 甲霜灵 代森锰锌          | Metalaxyl Mancozeb                      | 10 | 494.85  | 22.09  |
| 噁唑菌酮 代森锰锌         | Famoxadone Mancozeb                     | 9  | 997.64  | 40.08  |
| 吡唑醚菌酯             | Pyraclostrobin                          | 9  | 32.47   | 1.30   |
| 甲基硫菌灵             | Thiophanate-methyl                      | 8  | 273.00  | 9.75   |
| 三唑酮               | Triadimefon                             | 8  | 186.88  | 6.67   |
| 乙蒜素               | Ethylicin                               | 7  | 69.71   | 2.18   |
| 噁霉灵               | Hymexazol                               | 7  | 50.67   | 1.58   |
| 异菌脲               | Iprodione                               | 7  | 56.07   | 1.75   |
| 辛菌胺               | Xinjunan                                | 7  | 10.19   | 0.32   |
| 多菌灵 福美双 溴菌腈       | Carbendazim Thiram Bromothalonil        | 6  | 20.00   | 0.54   |
| 苯醚甲环唑 丙环唑         | Difenoconazole Propiconazol             | 6  | 226.90  | 6.08   |
| 烯酰吗啉 吡唑醚菌酯        | Dimethomorph Pyraclostrobin             | 6  | 24.15   | 0.65   |
| 盐酸吗啉胍 乙酸铜         | Moroxydine hydrochloride Copper acetate | 6  | 191.00  | 5.12   |
| 霜霉威               | Propamocarb                             | 6  | 216.55  | 5.80   |
| 多菌灵 代森锰锌          | Carbendazim Mancozeb                    | 5  | 195.00  | 4.35   |
| 烯酰吗啉 代森锰锌         | Dimethomorph Mancozeb                   | 5  | 86.25   | 1.93   |
| 氢氧化铜              | Copper hydroxide                        | 4  | 67.36   | 1.20   |
| 敌磺钠               | Fenaminsulf                             | 4  | 189.00  | 3.38   |
| 精甲霜灵 代森锰锌         | Metalaxyl-M Mancozeb                    | 4  | 411.40  | 7.35   |
| 腈菌唑 代森锰锌          | Myclobutanil Mancozeb                   | 4  | 485.00  | 8.66   |
| 丙森锌               | Propineb                                | 4  | 1369.38 | 24.45  |
| 福美锌               | Ziram                                   | 4  | 104.40  | 1.86   |
| 叶枯唑               | Bismertiazol                            | 3  | 17.67   | 0.24   |
| 多菌灵 福美双           | Carbendazim Thiram                      | 3  | 22.00   | 0.29   |
| 多菌灵 三唑酮           | Carbendazim Triadimefon                 | 3  | 115.33  | 1.54   |
| 氯溴异氰尿酸            | Chloroisobromine cyanuric acid          | 3  | 24.00   | 0.32   |
| 乙酸铜               | Copper acetate                          | 3  | 58.00   | 0.78   |
| 硫酸铜               | Copper sulfate                          | 3  | 71.00   | 0.95   |
| 烯唑醇               | Diniconazole                            | 3  | 27.17   | 0.36   |
| 敌磺钠 福美双           | Fenaminsulf Thiram                      | 3  | 18.40   | 0.25   |
| 甲霜灵               | Metalaxyl                               | 3  | 48.80   | 0.65   |
| 盐酸吗啉胍 辛菌胺         | Moroxydine hydrochloride Xinjunan       | 3  | 4.92    | 0.07   |
| 腈菌唑               | Myclobutanil                            | 3  | 43.73   | 0.59   |
| 咪鲜胺 多菌灵           | Prochloraz Carbendazim                  | 3  | 125.00  | 1.67   |



|               |                                                 |   |         |       |
|---------------|-------------------------------------------------|---|---------|-------|
| 吡唑醚菌酯 代森联     | Pyraclostrobin Metiram                          | 3 | 240.00  | 3.21  |
| 噻唑锌           | Saizuoxin                                       | 3 | 16.00   | 0.21  |
| 噻菌铜           | Thiediazole copper                              | 3 | 19.33   | 0.26  |
| 中生菌素          | Zhongshengmycin                                 | 3 | 4.24    | 0.06  |
| 氟吗啉 三乙膦酸铝     | Flumorph Fosetyl-aluminium                      | 2 | 100.00  | 0.89  |
| 氟硅唑           | Flusilazole                                     | 2 | 26.00   | 0.23  |
| 三乙膦酸铝         | Fosetyl-aluminium                               | 2 | 253.50  | 2.26  |
| 三乙膦酸铝 代森锰锌    | Fosetyl-aluminium Mancozeb                      | 2 | 126.00  | 1.13  |
| 己唑醇           | Hexaconazole                                    | 2 | 4.00    | 0.04  |
| 甲霜灵 噁霉灵       | Metalaxyl Hemexazol                             | 2 | 2.70    | 0.02  |
| 甲霜灵 福美双       | Metalaxyl Thiram                                | 2 | 1810.00 | 16.16 |
| 代森联           | Metiram                                         | 2 | 525.00  | 4.69  |
| 盐酸吗啉胍         | Moroxydine hydrochloride                        | 2 | 155.00  | 1.38  |
| 腈菌唑 福美双       | Myclobutanil Thiram                             | 2 | 30.00   | 0.27  |
| 宁南霉素          | Ningnanmycin                                    | 2 | 5.20    | 0.05  |
| 腐霉利           | Procymidone                                     | 2 | 2.75    | 0.02  |
| 松脂酸铜          | Songzhisuantong                                 | 2 | 84.70   | 0.76  |
| 福美双 福美锌       | Thiram Ziram                                    | 2 | 72.00   | 0.64  |
| 肟菌酯 戊唑醇       | Trifloxystrobin Tebuconazole                    | 2 | 28.13   | 0.25  |
| 噻霉酮           | Benziothiazolinone                              | 1 | 4.20    | 0.02  |
| 溴菌腈           | Bromothalonil                                   | 1 | 170.00  | 0.76  |
| 溴菌腈 多菌灵       | Bromothalonil Carbendazim                       | 1 | 100.00  | 0.45  |
| 多菌灵 五氯硝基苯     | Carbendazim Quintozene                          | 1 | 40.00   | 0.18  |
| 霜脲氰 丙森锌       | Cymoxanil Propineb                              | 1 | 90.00   | 0.40  |
| 烯酰吗啉 三乙膦酸铝    | Dimethomorph Fosetyl-aluminium                  | 1 | 500.00  | 2.23  |
| 烯酰吗啉 甲霜灵      | Dimethomorph Metalaxyl                          | 1 | 6.00    | 0.03  |
| 烯酰吗啉 丙森锌      | Dimethomorph Propineb                           | 1 | 570.00  | 2.54  |
| 稻瘟净           | EBP                                             | 1 | 12.00   | 0.05  |
| 乙嘧酚           | Ethirimol                                       | 1 | 420.00  | 1.88  |
| 丁子香酚          | Eugenol                                         | 1 | 15.00   | 0.07  |
| 噁唑菌酮 氟硅唑      | Famoxadone Flusilazole                          | 1 | 51.68   | 0.23  |
| 氟吗啉 代森锰锌      | Flumorph Mancozeb                               | 1 | 15.00   | 0.07  |
| 香菇多糖          | Fungous proteoglycan                            | 1 | 4.50    | 0.02  |
| 噁霉灵 福美双       | Hemexazol Thiram                                | 1 | 10.90   | 0.05  |
| 稻瘟灵           | Isoprothiolane                                  | 1 | 24.00   | 0.11  |
| 稻瘟灵 己唑醇       | Isoprothiolane Hexaconazole                     | 1 | 54.00   | 0.24  |
| 精甲霜灵 咯菌腈      | Metalaxyl-M Fludioxonil                         | 1 | 4.38    | 0.02  |
| 嘧啶核苷类抗菌素      | Midingheganleikangjunsu                         | 1 | 60.00   | 0.27  |
| 噁霜灵 代森锰锌      | Oxadixyl Mancozeb                               | 1 | 64.00   | 0.29  |
| 啶啉铜           | Oxine-copper                                    | 1 | 50.25   | 0.22  |
| 申嗪菌素 丁子香酚 咯菌腈 | Phenazino-1-carboxylic acid Eugenol Fludioxonil | 1 | 120.00  | 0.54  |
| 多抗霉素          | Polyoxin                                        | 1 | 1.20    | 0.01  |
| 咪鲜胺 异菌脲       | Prochloraz Iprodione                            | 1 | 16.00   | 0.07  |
| 咪鲜胺 松脂酸铜      | Prochloraz Songzhisuantong                      | 1 | 4.50    | 0.02  |
| 丙森锌 缬霉威       | Propineb Iprovalicarb                           | 1 | 133.60  | 0.60  |
| 荧光假单胞杆菌       | Pseudomonas fluorescens                         | 1 | 100.00  | 0.45  |
| 嘧霉胺           | Pyrimethanil                                    | 1 | 24.00   | 0.11  |

|           |                              |   |       |      |
|-----------|------------------------------|---|-------|------|
| 噻菌茂       | Saijunmao                    | 1 | 14.00 | 0.06 |
| 戊唑醇       | Tebuconazole                 | 1 | 6.45  | 0.03 |
| 甲基硫菌灵 噁霉灵 | Thiophanate-methyl Hymexazol | 1 | 8.40  | 0.04 |
| 福美双       | Thiram                       | 1 | 75.00 | 0.33 |
| 甲基立枯磷     | Tolclofos-methyl             | 1 | 16.00 | 0.07 |

**Table S4**Effects of pesticide use on the blood chemistry panel (1) ( $n=214$ )

| Variables                            | ALT                      | AST                    | CHE                      | TP                       | BUN                      | Cr                         |
|--------------------------------------|--------------------------|------------------------|--------------------------|--------------------------|--------------------------|----------------------------|
| Glyphosate                           | -0.58<br>(-1.68,0.51)    | -0.06<br>(-0.84,0.71)  | -0.08<br>(-0.18,0.03)    | 0.02<br>(-0.27,0.30)     | -0.05<br>(-0.17,0.07)    | -0.53<br>(-1.87,0.81)      |
| Non-glyphosate herbicides            | -0.05<br>(-0.88,0.79)    | 0.31<br>(-0.27,0.90)   | 0.05<br>(-0.03,0.13)     | 0.12<br>(-0.10,0.34)     | 0.10*<br>(0.00,0.19)     | 1.75**<br>(0.74,2.77)      |
| Chemical lepidopteran insecticides   | 0.65**<br>(0.16,1.14)    | 0.30<br>(-0.04,0.65)   | -0.01<br>(-0.06,0.04)    | 0.03<br>(-0.10,0.15)     | 0.02<br>(-0.04,0.07)     | -0.21<br>(-0.80,0.38)      |
| Biological lepidopteran insecticides | -0.17<br>(-2.02,1.69)    | -0.20<br>(-1.51,1.11)  | 0.10<br>(-0.08,0.27)     | -0.19<br>(-0.67,0.29)    | -0.12<br>(-0.33,0.08)    | -0.29<br>(-2.57,2.00)      |
| Non-lepidopteran insecticides        | -0.55<br>(-2.96,1.85)    | 0.04<br>(-1.75,1.82)   | -0.01<br>(-0.22,0.20)    | -0.03<br>(-0.62,0.55)    | -0.23<br>(-0.48,0.02)    | -1.27<br>(-4.02,1.48)      |
| Fungicides                           | 1.43*<br>(0.35,2.52)     | 1.64**<br>(0.86,2.41)  | -0.02<br>(-0.12,0.09)    | 0.21<br>(-0.07,0.48)     | 0.11<br>(-0.01,0.23)     | 0.28<br>(-1.02,1.59)       |
| Age (year)                           | -0.22**<br>(-0.38,-0.05) | -0.06<br>(-0.17,0.05)  | -0.00<br>(-0.02,0.01)    | -0.05*<br>(-0.09,-0.01)  | -0.01<br>(-0.03,0.01)    | -0.07<br>(-0.27,0.13)      |
| Female (yes=1, no=0)                 | -0.72<br>(-4.84,3.41)    | -0.03<br>(-2.93,2.86)  | -0.13<br>(-0.52,0.27)    | 0.75<br>(-0.33,1.83)     | -0.62**<br>(-1.08,-0.15) | -13.57**<br>(-19.65,-7.48) |
| Body mass index (kg/m <sup>2</sup> ) | 1.00**<br>(0.53,1.46)    | 0.21<br>(-0.11,0.53)   | 0.01<br>(-0.04,0.05)     | 0.10<br>(-0.02,0.22)     | 0.01<br>(-0.04,0.06)     | 0.42<br>(-0.15,0.98)       |
| Cigarette intake (yes=1, no=0)       | 3.05<br>(-0.51,6.62)     | 3.03*<br>(0.51,5.55)   | -0.13<br>(-0.47,0.21)    | -0.99*<br>(-1.92,-0.06)  | -0.14<br>(-0.54,0.26)    | -3.10<br>(-7.54,1.33)      |
| Alcohol consumption (yes=1, no=0)    | -0.35<br>(-3.62,2.92)    | 1.26<br>(-1.05,3.58)   | -0.03<br>(-0.34,0.28)    | 0.03<br>(-0.82,0.88)     | -0.06<br>(-0.42,0.30)    | 5.66**<br>(1.66,9.65)      |
| Protective measure (yes=1, no=0)     | -2.16<br>(-6.54,2.22)    | -0.75<br>(-3.85,2.35)  | 0.16<br>(-0.26,0.58)     | 0.40<br>(-0.74,1.55)     | -0.12<br>(-0.60,0.37)    | 3.05<br>(-2.43,8.54)       |
| Guangdong (yes=1, no=0)              | 4.70*<br>(0.46,8.95)     | 3.28*<br>(0.28,6.27)   | -0.05<br>(-0.46,0.36)    | -4.39**<br>(-5.54,-3.25) | -0.12<br>(-0.59,0.35)    | 2.46<br>(-3.18,8.10)       |
| Jiangxi (yes=1, no=0)                | 4.91*<br>(0.75,9.07)     | 5.02**<br>(2.07,7.96)  | -0.61**<br>(-1.01,-0.22) | 0.18<br>(-0.91,1.26)     | 0.65**<br>(0.19,1.11)    | -8.09**<br>(-13.32,-2.85)  |
| Baseline indicator                   | 0.41**<br>(0.26,0.56)    | 0.14*<br>(0.03,0.25)   | 0.70**<br>(0.61,0.79)    | 0.35**<br>(0.27,0.44)    | 0.50**<br>(0.36,0.63)    | 0.36**<br>(0.18,0.53)      |
| Constant                             | -1.79<br>(-17.74,14.15)  | 14.91*<br>(3.48,26.35) | 2.25**<br>(0.67,3.84)    | 43.93**<br>(36.47,51.38) | 3.12**<br>(1.27,4.97)    | 47.13**<br>(25.50,68.76)   |
| Adjusted $R^2$                       | 0.36                     | 0.26                   | 0.62                     | 0.48                     | 0.30                     | 0.47                       |

Figures in the parentheses are 95% confidence intervals. \*\*  $p < 0.01$ , and \*  $p < 0.05$ .

**Table S5**  
Effects of pesticide use on the blood chemistry panel (2) ( $n=214$ )

| Variables                            | Na                          | K                     | P                     | VB <sub>12</sub>               | VB <sub>9</sub>         | GLU                   | CRP                   |
|--------------------------------------|-----------------------------|-----------------------|-----------------------|--------------------------------|-------------------------|-----------------------|-----------------------|
| Glyphosate                           | 0.14<br>(-0.10,0.38)        | 0.04<br>(-0.01,0.09)  | 0.01<br>(-0.01,0.02)  | -0.82<br>(-19.37,17.72)        | -0.17<br>(-0.57,0.23)   | 0.03<br>(-0.05,0.11)  | -0.24<br>(-0.73,0.26) |
| Non-glyphosate herbicides            | 0.12<br>(-0.06,0.30)        | 0.01<br>(-0.02,0.05)  | 0.00<br>(-0.01,0.02)  | -1.55<br>(-15.72,12.63)        | -0.35*<br>(-0.65,-0.05) | 0.01<br>(-0.05,0.07)  | -0.05<br>(-0.43,0.33) |
| Chemical lepidopteran insecticides   | -0.02<br>(-0.13,0.08)       | -0.02<br>(-0.04,0.00) | 0.01<br>(-0.00,0.01)  | -1.02<br>(-9.31,7.26)          | -0.00<br>(-0.18,0.17)   | 0.04*<br>(0.00,0.07)  | 0.25*<br>(0.03,0.47)  |
| Biological lepidopteran insecticides | -0.19<br>(-0.59,0.21)       | 0.01<br>(-0.07,0.09)  | -0.00<br>(-0.03,0.03) | -6.97<br>(-38.34,24.39)        | 0.30<br>(-0.38,0.98)    | 0.05<br>(-0.08,0.18)  | 0.16<br>(-0.68,1.00)  |
| Non-lepidopteran insecticides        | 0.07<br>(-0.42,0.56)        | -0.02<br>(-0.12,0.07) | 0.02<br>(-0.01,0.06)  | 24.10<br>(-13.97,62.18)        | -0.25<br>(-1.06,0.57)   | -0.13<br>(-0.29,0.03) | -0.67<br>(-1.69,0.35) |
| Fungicides                           | 0.03<br>(-0.20,0.26)        | -0.02<br>(-0.06,0.03) | -0.01<br>(-0.02,0.01) | -19.81*<br>(-37.96,-1.66)      | 0.10<br>(-0.29,0.49)    | -0.01<br>(-0.08,0.07) | 0.07<br>(-0.41,0.56)  |
| Age (year)                           | 0.03<br>(-0.00,0.07)        | -0.00<br>(-0.01,0.00) | 0.00<br>(-0.00,0.00)  | -0.22<br>(-2.94,2.50)          | -0.03<br>(-0.09,0.03)   | 0.00<br>(-0.01,0.01)  | -0.01<br>(-0.08,0.06) |
| Female (yes=1, no=0)                 | 0.07<br>(-0.83,0.97)        | -0.07<br>(-0.24,0.10) | 0.02<br>(-0.05,0.09)  | 0.03<br>(-69.30,69.35)         | 1.93*<br>(0.43,3.44)    | 0.10<br>(-0.19,0.39)  | -0.80<br>(-2.65,1.06) |
| Body mass index (kg/m <sup>2</sup> ) | 0.06<br>(-0.03,0.16)        | -0.01<br>(-0.03,0.01) | 0.00<br>(-0.00,0.01)  | -3.43<br>(-11.25,4.38)         | -0.18*<br>(-0.35,-0.02) | 0.00<br>(-0.03,0.04)  | 0.02<br>(-0.19,0.23)  |
| Cigarette intake (yes=1, no=0)       | -0.08<br>(-0.86,0.69)       | 0.08<br>(-0.08,0.23)  | -0.02<br>(-0.07,0.04) | -21.17<br>(-81.83,39.48)       | 0.28<br>(-1.02,1.57)    | -0.03<br>(-0.28,0.22) | 0.48<br>(-1.13,2.10)  |
| Alcohol consumption (yes=1, no=0)    | -0.11<br>(-0.82,0.60)       | -0.07<br>(-0.21,0.07) | 0.04<br>(-0.02,0.09)  | 21.21<br>(-34.15,76.57)        | -0.07<br>(-1.26,1.11)   | 0.22<br>(-0.01,0.45)  | -0.14<br>(-1.63,1.34) |
| Protective measure (yes=1, no=0)     | 0.77<br>(-0.19,1.73)        | -0.16<br>(-0.35,0.02) | 0.03<br>(-0.04,0.09)  | 31.61<br>(-42.54,105.76)       | 1.05<br>(-0.54,2.63)    | -0.17<br>(-0.48,0.14) | -0.80<br>(-2.78,1.19) |
| Guangdong (yes=1, no=0)              | -0.46<br>(-1.38,0.46)       | -0.11<br>(-0.29,0.07) | 0.49**<br>(0.43,0.56) | -223.64**<br>(-311.40,-135.88) | -1.59<br>(-3.34,0.16)   | 0.24<br>(-0.06,0.54)  | -1.04<br>(-2.96,0.87) |
| Jiangxi (yes=1, no=0)                | -0.25<br>(-1.20,0.70)       | -0.07<br>(-0.24,0.11) | 0.02<br>(-0.05,0.09)  | 43.48<br>(-28.59,115.54)       | -1.65<br>(-3.43,0.13)   | -0.20<br>(-0.50,0.09) | -1.24<br>(-3.13,0.64) |
| Baseline indicator                   | 0.03<br>(-0.12,0.17)        | 0.06<br>(-0.05,0.16)  | 0.12<br>(-0.05,0.29)  | -0.02<br>(-0.15,0.12)          | 0.13<br>(-0.02,0.29)    | 0.60**<br>(0.49,0.71) | 0.30**<br>(0.12,0.49) |
| Constant                             | 134.15**<br>(112.82,155.47) | 4.67**<br>(3.88,5.45) | 0.89**<br>(0.57,1.21) | 653.18**<br>(381.68,924.69)    | 15.67**<br>(9.88,21.47) | 1.27*<br>(0.09,2.44)  | 1.44<br>(-5.83,8.71)  |
| Adjusted $R^2$                       | 0.02                        | 0.00                  | 0.63                  | 0.30                           | 0.06                    | 0.42                  | 0.04                  |

Figures in the parentheses are 95% confidence intervals. \*\*  $p < 0.01$ , and \*  $p < 0.05$ .

**Table S6**  
Effects of pesticide use on motor nerve conduction (1) ( $n=218$ )

| Variables                            | MMCV                     | UMCV                     | TMCV                     | PMCV                     | MDML                  | UDML                    | TDML                     | PDML                    |
|--------------------------------------|--------------------------|--------------------------|--------------------------|--------------------------|-----------------------|-------------------------|--------------------------|-------------------------|
| Glyphosate                           | 0.18<br>(-0.21,0.57)     | 0.23<br>(-0.16,0.61)     | -0.32<br>(-0.65,0.02)    | 0.00<br>(-0.30,0.30)     | 0.01<br>(-0.04,0.06)  | -0.01<br>(-0.03,0.02)   | 0.04<br>(-0.00,0.09)     | 0.03<br>(-0.02,0.07)    |
| Non-glyphosate herbicides            | -0.05<br>(-0.37,0.27)    | -0.14<br>(-0.45,0.17)    | -0.11<br>(-0.39,0.16)    | -0.04<br>(-0.28,0.20)    | -0.00<br>(-0.04,0.04) | -0.00<br>(-0.03,0.02)   | -0.01<br>(-0.05,0.03)    | -0.00<br>(-0.04,0.03)   |
| Chemical lepidopteran insecticides   | -0.20*<br>(-0.37,-0.02)  | -0.20*<br>(-0.38,-0.03)  | -0.19*<br>(-0.34,-0.04)  | -0.18**<br>(-0.31,-0.04) | 0.02<br>(-0.00,0.04)  | 0.01*<br>(0.00,0.02)    | -0.01<br>(-0.03,0.01)    | -0.01<br>(-0.03,0.01)   |
| Biological lepidopteran insecticides | -0.13<br>(-0.78,0.52)    | -0.16<br>(-0.81,0.48)    | -0.06<br>(-0.62,0.50)    | 0.38<br>(-0.12,0.88)     | 0.01<br>(-0.07,0.09)  | -0.05<br>(-0.09,0.00)   | 0.01<br>(-0.07,0.08)     | 0.02<br>(-0.06,0.09)    |
| Non-lepidopteran insecticides        | 0.02<br>(-0.78,0.82)     | 0.25<br>(-0.54,1.04)     | -0.12<br>(-0.81,0.57)    | -0.34<br>(-0.96,0.28)    | -0.04<br>(-0.14,0.06) | 0.02<br>(-0.03,0.08)    | 0.01<br>(-0.08,0.10)     | 0.08<br>(-0.02,0.17)    |
| Fungicides                           | 0.28<br>(-0.10,0.66)     | -0.18<br>(-0.55,0.20)    | -0.05<br>(-0.38,0.28)    | -0.18<br>(-0.47,0.11)    | -0.00<br>(-0.05,0.05) | 0.01<br>(-0.02,0.03)    | 0.01<br>(-0.03,0.05)     | 0.02<br>(-0.03,0.06)    |
| Age (year)                           | -0.09**<br>(-0.15,-0.03) | -0.07*<br>(-0.13,-0.01)  | -0.03<br>(-0.08,0.02)    | -0.03<br>(-0.08,0.01)    | 0.01<br>(-0.00,0.01)  | 0.00*<br>(0.00,0.01)    | -0.00<br>(-0.01,0.00)    | 0.00<br>(-0.00,0.01)    |
| Female (yes=1, no=0)                 | -0.81<br>(-2.28,0.67)    | 1.65*<br>(0.20,3.11)     | -0.65<br>(-1.90,0.60)    | 0.61<br>(-0.51,1.73)     | -0.01<br>(-0.19,0.17) | -0.11*<br>(-0.22,-0.01) | -0.23**<br>(-0.39,-0.06) | 0.01<br>(-0.16,0.18)    |
| Body mass index (kg/m <sup>2</sup> ) | -0.07<br>(-0.24,0.11)    | -0.04<br>(-0.21,0.13)    | -0.03<br>(-0.18,0.12)    | 0.03<br>(-0.10,0.17)     | 0.02<br>(-0.01,0.04)  | -0.01<br>(-0.02,0.00)   | -0.00<br>(-0.02,0.02)    | -0.01<br>(-0.03,0.01)   |
| Cigarette intake (yes=1, no=0)       | -0.62<br>(-1.88,0.63)    | 0.44<br>(-0.81,1.69)     | -0.25<br>(-1.33,0.83)    | -0.28<br>(-1.24,0.69)    | -0.07<br>(-0.22,0.09) | -0.08<br>(-0.17,0.00)   | -0.12<br>(-0.26,0.02)    | -0.01<br>(-0.15,0.14)   |
| Alcohol consumption (yes=1, no=0)    | 0.07<br>(-1.08,1.22)     | -0.35<br>(-1.48,0.79)    | -0.87<br>(-1.86,0.12)    | -0.20<br>(-1.08,0.68)    | -0.05<br>(-0.20,0.09) | 0.02<br>(-0.06,0.10)    | -0.02<br>(-0.15,0.11)    | 0.08<br>(-0.05,0.22)    |
| Protective measure (yes=1, no=0)     | 0.35<br>(-1.27,1.97)     | 0.03<br>(-1.57,1.63)     | 0.25<br>(-1.14,1.65)     | 0.57<br>(-0.68,1.82)     | -0.18<br>(-0.38,0.02) | 0.01<br>(-0.11,0.12)    | 0.13<br>(-0.05,0.31)     | 0.14<br>(-0.05,0.33)    |
| Guangdong (yes=1, no=0)              | 0.83<br>(-0.68,2.34)     | 0.44<br>(-1.05,1.93)     | 0.66<br>(-0.64,1.96)     | 0.29<br>(-0.87,1.45)     | 0.04<br>(-0.15,0.23)  | 0.12*<br>(0.01,0.22)    | -0.16<br>(-0.33,0.01)    | -0.19*<br>(-0.37,-0.02) |
| Jiangxi (yes=1, no=0)                | 0.69<br>(-0.80,2.17)     | 0.56<br>(-0.92,2.04)     | -0.24<br>(-1.51,1.03)    | -0.30<br>(-1.43,0.83)    | -0.07<br>(-0.25,0.11) | 0.02<br>(-0.09,0.12)    | 0.03<br>(-0.14,0.19)     | -0.02<br>(-0.19,0.16)   |
| Baseline indicator                   | 0.40**<br>(0.27,0.53)    | 0.45**<br>(0.31,0.59)    | 0.40**<br>(0.28,0.53)    | 0.67**<br>(0.57,0.77)    | 0.27**<br>(0.17,0.37) | 0.01<br>(-0.05,0.07)    | 0.33**<br>(0.19,0.46)    | 0.52**<br>(0.44,0.60)   |
| Constant                             | 42.62**<br>(32.16,53.08) | 36.34**<br>(25.74,46.94) | 32.15**<br>(23.86,40.43) | 17.47**<br>(10.27,24.67) | 1.76**<br>(0.97,2.54) | 2.57**<br>(2.12,3.02)   | 2.79**<br>(1.95,3.62)    | 1.87**<br>(1.13,2.60)   |
| Adjusted $R^2$                       | 0.25                     | 0.27                     | 0.28                     | 0.56                     | 0.16                  | 0.09                    | 0.11                     | 0.48                    |

Figures in the parentheses are 95% confidence intervals. \*\*  $p < 0.01$ , and \*  $p < 0.05$ .

**Table S7**Effects of pesticide use on motor nerve conduction (2) ( $n=218$ )

| Variables                            | MPCMAP                 | MDCMAP                 | UPCMAP                   | UDCMAP                   | TPCMAP                   | TDCMAP                   | PPCMAP                  | PDCMAP                   |
|--------------------------------------|------------------------|------------------------|--------------------------|--------------------------|--------------------------|--------------------------|-------------------------|--------------------------|
| Glyphosate                           | 0.22<br>(-0.04,0.48)   | 0.24<br>(-0.03,0.51)   | 0.01<br>(-0.16,0.18)     | 0.03<br>(-0.13,0.19)     | 0.06<br>(-0.18,0.30)     | -0.11<br>(-0.42,0.20)    | 0.01<br>(-0.17,0.18)    | 0.06<br>(-0.13,0.25)     |
| Non-glyphosate herbicides            | 0.05<br>(-0.16,0.26)   | 0.04<br>(-0.17,0.26)   | 0.03<br>(-0.11,0.17)     | 0.01<br>(-0.12,0.14)     | -0.01<br>(-0.20,0.18)    | 0.05<br>(-0.20,0.31)     | 0.05<br>(-0.10,0.19)    | 0.12<br>(-0.04,0.27)     |
| Chemical lepidopteran insecticides   | -0.05<br>(-0.16,0.07)  | -0.05<br>(-0.17,0.07)  | 0.00<br>(-0.07,0.08)     | -0.00<br>(-0.07,0.07)    | -0.11<br>(-0.21,0.00)    | -0.09<br>(-0.23,0.05)    | 0.00<br>(-0.08,0.08)    | -0.01<br>(-0.10,0.07)    |
| Biological lepidopteran insecticides | -0.06<br>(-0.50,0.37)  | -0.10<br>(-0.54,0.35)  | 0.12<br>(-0.17,0.41)     | 0.08<br>(-0.19,0.35)     | -0.04<br>(-0.44,0.36)    | -0.19<br>(-0.70,0.33)    | -0.04<br>(-0.33,0.25)   | -0.05<br>(-0.36,0.27)    |
| Non-lepidopteran insecticides        | -0.16<br>(-0.69,0.37)  | -0.19<br>(-0.73,0.36)  | 0.07<br>(-0.28,0.41)     | -0.06<br>(-0.38,0.27)    | -0.26<br>(-0.76,0.23)    | -0.51<br>(-1.15,0.13)    | -0.31<br>(-0.67,0.05)   | 0.03<br>(-0.36,0.41)     |
| Fungicides                           | -0.24<br>(-0.49,0.01)  | -0.20<br>(-0.46,0.06)  | -0.06<br>(-0.22,0.10)    | -0.06<br>(-0.21,0.10)    | 0.18<br>(-0.05,0.41)     | 0.28<br>(-0.02,0.58)     | -0.05<br>(-0.22,0.12)   | -0.08<br>(-0.26,0.10)    |
| Age (year)                           | -0.02<br>(-0.06,0.02)  | -0.03<br>(-0.07,0.01)  | -0.02<br>(-0.04,0.01)    | -0.01<br>(-0.03,0.01)    | -0.07**<br>(-0.10,-0.03) | -0.06*<br>(-0.11,-0.01)  | -0.03*<br>(-0.06,-0.01) | -0.05**<br>(-0.08,-0.02) |
| Female (yes=1, no=0)                 | -0.42<br>(-1.39,0.55)  | -0.60<br>(-1.59,0.39)  | 0.28<br>(-0.36,0.92)     | 0.10<br>(-0.50,0.71)     | 0.54<br>(-0.35,1.42)     | 1.05<br>(-0.10,2.20)     | 0.38<br>(-0.28,1.04)    | 0.31<br>(-0.40,1.02)     |
| Body mass index (kg/m <sup>2</sup> ) | 0.02<br>(-0.09,0.14)   | 0.02<br>(-0.10,0.13)   | -0.03<br>(-0.11,0.04)    | 0.00<br>(-0.07,0.07)     | -0.09<br>(-0.20,0.02)    | 0.01<br>(-0.12,0.15)     | -0.08*<br>(-0.16,-0.01) | -0.03<br>(-0.11,0.06)    |
| Cigarette intake (yes=1, no=0)       | -0.46<br>(-1.29,0.38)  | -0.73<br>(-1.59,0.12)  | -0.15<br>(-0.70,0.40)    | 0.03<br>(-0.49,0.54)     | 0.02<br>(-0.74,0.78)     | 0.04<br>(-0.96,1.03)     | 0.20<br>(-0.36,0.77)    | -0.04<br>(-0.65,0.57)    |
| Alcohol consumption (yes=1, no=0)    | 0.03<br>(-0.73,0.80)   | 0.16<br>(-0.62,0.94)   | 0.15<br>(-0.34,0.65)     | 0.08<br>(-0.39,0.55)     | -0.39<br>(-1.09,0.31)    | 0.07<br>(-0.84,0.98)     | -0.34<br>(-0.85,0.18)   | -0.11<br>(-0.66,0.45)    |
| Protective measure (yes=1, no=0)     | 0.57<br>(-0.52,1.65)   | 0.28<br>(-0.83,1.38)   | 0.56<br>(-0.14,1.27)     | 0.39<br>(-0.27,1.05)     | 1.22*<br>(0.23,2.20)     | 0.21<br>(-1.08,1.50)     | 0.16<br>(-0.57,0.89)    | -0.34<br>(-1.13,0.45)    |
| Guangdong (yes=1, no=0)              | 0.56<br>(-0.44,1.57)   | 0.58<br>(-0.44,1.61)   | 0.31<br>(-0.35,0.97)     | 0.44<br>(-0.18,1.06)     | -1.31**<br>(-2.23,-0.39) | -1.62**<br>(-2.82,-0.43) | 0.40<br>(-0.27,1.08)    | 0.49<br>(-0.24,1.22)     |
| Jiangxi (yes=1, no=0)                | -0.11<br>(-1.09,0.86)  | -0.53<br>(-1.53,0.47)  | -1.16**<br>(-1.80,-0.53) | -1.07**<br>(-1.67,-0.47) | -1.72**<br>(-2.62,-0.82) | -1.74**<br>(-2.91,-0.58) | -0.74*<br>(-1.40,-0.08) | -0.96**<br>(-1.67,-0.25) |
| Baseline indicator                   | 0.50**<br>(0.40,0.59)  | 0.51**<br>(0.42,0.61)  | 0.47**<br>(0.38,0.56)    | 0.52**<br>(0.44,0.61)    | 0.68**<br>(0.59,0.77)    | 0.74**<br>(0.64,0.84)    | 0.74**<br>(0.66,0.82)   | 0.75**<br>(0.66,0.83)    |
| Constant                             | 6.09**<br>(1.66,10.52) | 7.22**<br>(2.67,11.77) | 7.26**<br>(4.44,10.07)   | 5.75**<br>(3.07,8.43)    | 10.15**<br>(6.12,14.17)  | 7.94**<br>(2.73,13.14)   | 5.35**<br>(2.44,8.25)   | 4.93**<br>(1.75,8.10)    |
| Adjusted $R^2$                       | 0.36                   | 0.40                   | 0.46                     | 0.51                     | 0.63                     | 0.58                     | 0.69                    | 0.68                     |

Figures in the parentheses are 95% confidence intervals. \*\*  $p < 0.01$ , and \*  $p < 0.05$ .

**Table S8**Effects of pesticide use on sensory nerve conduction ( $n=218$ )

| Variables                            | MSCV                     | USCV                     | SSCV                     | MSNAP                    | USNAP                    | SSNAP                    |
|--------------------------------------|--------------------------|--------------------------|--------------------------|--------------------------|--------------------------|--------------------------|
| Glyphosate                           | 0.00<br>(-0.42,0.42)     | 0.16<br>(-0.23,0.56)     | -0.10<br>(-0.55,0.36)    | -0.12<br>(-0.32,0.09)    | -0.06<br>(-0.20,0.09)    | -0.15<br>(-0.64,0.35)    |
| Non-glyphosate herbicides            | -0.34<br>(-0.68,0.00)    | -0.04<br>(-0.36,0.29)    | -0.13<br>(-0.49,0.24)    | 0.08<br>(-0.08,0.25)     | 0.11<br>(-0.01,0.23)     | -0.15<br>(-0.55,0.25)    |
| Chemical lepidopteran insecticides   | -0.19*<br>(-0.38,-0.00)  | -0.20*<br>(-0.38,-0.02)  | 0.01<br>(-0.20,0.21)     | -0.00<br>(-0.10,0.09)    | 0.04<br>(-0.02,0.11)     | 0.05<br>(-0.17,0.27)     |
| Biological lepidopteran insecticides | 0.22<br>(-0.48,0.92)     | -0.28<br>(-0.94,0.37)    | -0.30<br>(-1.05,0.46)    | -0.04<br>(-0.39,0.30)    | 0.06<br>(-0.18,0.31)     | -0.34<br>(-1.17,0.48)    |
| Non-lepidopteran insecticides        | 0.50<br>(-0.36,1.36)     | -0.45<br>(-1.25,0.36)    | -0.53<br>(-1.46,0.40)    | -0.13<br>(-0.56,0.29)    | 0.06<br>(-0.24,0.36)     | 0.41<br>(-0.61,1.42)     |
| Fungicides                           | 0.08<br>(-0.33,0.48)     | -0.16<br>(-0.54,0.22)    | -0.23<br>(-0.67,0.21)    | -0.02<br>(-0.22,0.18)    | -0.20**<br>(-0.34,-0.05) | -0.42<br>(-0.90,0.06)    |
| Age (year)                           | -0.09**<br>(-0.15,-0.03) | -0.16**<br>(-0.22,-0.10) | -0.05<br>(-0.12,0.02)    | -0.05**<br>(-0.08,-0.02) | -0.07**<br>(-0.09,-0.05) | -0.18**<br>(-0.26,-0.10) |
| Female (yes=1, no=0)                 | -0.75<br>(-2.31,0.81)    | 1.43<br>(-0.04,2.90)     | 1.75*<br>(0.04,3.46)     | 0.06<br>(-0.71,0.83)     | 0.68*<br>(0.11,1.25)     | -0.28<br>(-2.12,1.56)    |
| Body mass index (kg/m2)              | -0.24*<br>(-0.42,-0.05)  | 0.04<br>(-0.13,0.22)     | 0.16<br>(-0.04,0.36)     | 0.01<br>(-0.09,0.10)     | -0.05<br>(-0.12,0.01)    | -0.26*<br>(-0.48,-0.04)  |
| Cigarette intake (yes=1, no=0)       | 0.27<br>(-1.08,1.62)     | 0.12<br>(-1.15,1.38)     | -0.34<br>(-1.80,1.11)    | -0.34<br>(-1.00,0.32)    | 0.30<br>(-0.17,0.77)     | -0.74<br>(-2.33,0.85)    |
| Alcohol consumption (yes=1, no=0)    | 0.14<br>(-1.10,1.37)     | 0.51<br>(-0.65,1.67)     | -0.69<br>(-2.02,0.64)    | 0.25<br>(-0.36,0.85)     | -0.21<br>(-0.65,0.22)    | -0.28<br>(-1.73,1.18)    |
| Protective measure (yes=1, no=0)     | -0.97<br>(-2.73,0.80)    | -0.90<br>(-2.53,0.74)    | -1.38<br>(-3.28,0.52)    | 0.22<br>(-0.64,1.07)     | 0.36<br>(-0.24,0.97)     | 0.11<br>(-1.95,2.17)     |
| Guangdong (yes=1, no=0)              | -2.04*<br>(-3.66,-0.41)  | -0.12<br>(-1.64,1.39)    | -0.45<br>(-2.20,1.31)    | -0.24<br>(-1.05,0.56)    | -0.02<br>(-0.59,0.55)    | 0.89<br>(-1.03,2.81)     |
| Jiangxi (yes=1, no=0)                | 2.67**<br>(1.08,4.26)    | 0.56<br>(-1.00,2.11)     | -0.88<br>(-2.60,0.85)    | 0.02<br>(-0.76,0.80)     | 0.12<br>(-0.44,0.67)     | -0.01<br>(-1.88,1.86)    |
| Baseline indicator                   | 0.63**<br>(0.53,0.72)    | 0.25**<br>(0.14,0.36)    | 0.25**<br>(0.14,0.37)    | 0.68**<br>(0.59,0.77)    | 0.63**<br>(0.55,0.72)    | 0.50**<br>(0.40,0.60)    |
| Constant                             | 31.89**<br>(22.80,40.98) | 47.87**<br>(39.35,56.39) | 44.17**<br>(34.54,53.80) | 4.44**<br>(1.17,7.70)    | 6.25**<br>(3.84,8.67)    | 23.18**<br>(15.19,31.18) |
| Adjusted $R^2$                       | 0.54                     | 0.26                     | 0.19                     | 0.58                     | 0.66                     | 0.50                     |

Figures in the parentheses are 95% confidence intervals. \*\*  $p < 0.01$ , and \*  $p < 0.05$ .
